# Supplementary material for: miR-449a inhibits colorectal cancer progression by targeting SATB2
Source: PubMed Central journal article supplement (PMC5731849; doi:10.18632/oncotarget.10900), 2016-07-28
Supplement: oncotarget-08-100975-s001.pdf [file oncotarget-08-100975-s001.pdf]

## miR-449a inhibits colorectal cancer progression by targeting SATB2

### Supplementary Materials

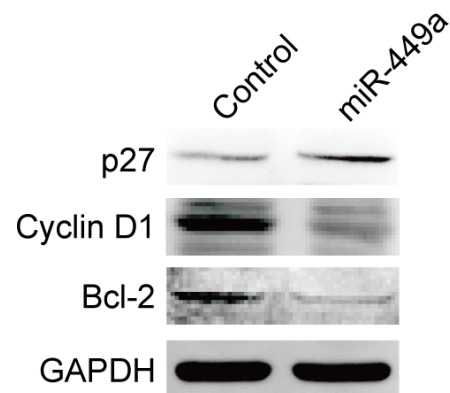

**Supplementary Figure S1: miR-449a elevates the expression of p27 and reduces the expression of CyclinD1 and Bcl-2 in CRC cells.** (A) miR-449a overexpression increased p27 and decreased Cyclin D1 and Bcl-2 protein level in HCT116 cells.

### A KEGG pathway analysis

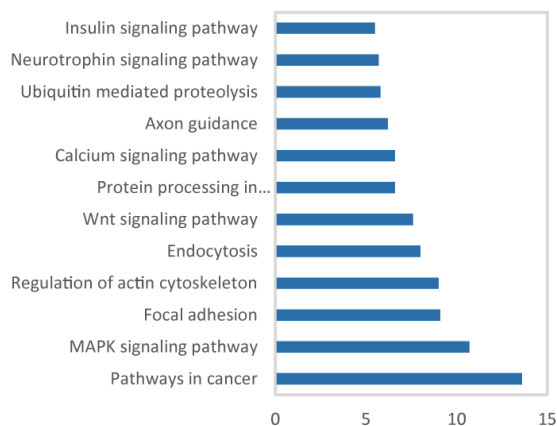

### B

### GO analysis

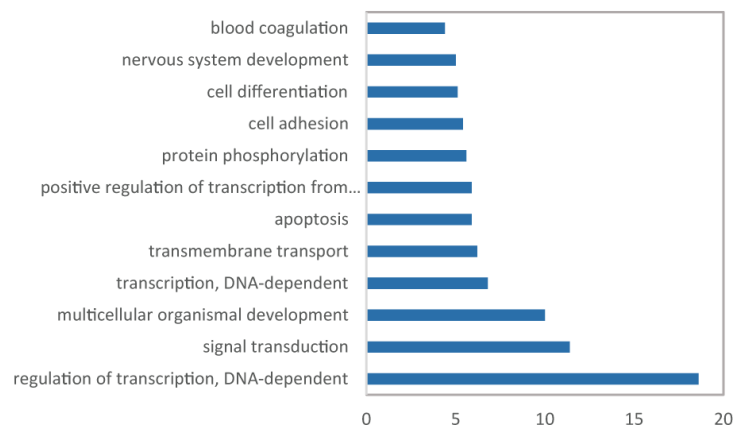

**Supplementary Figure S2: AZA and TSA treatment reverses a series of pathways and functions.** (A) KEGG pathway analysis after AZA and TSA treatment in RKO cells. (B) GO analysis after AZA and TSA treatment in RKO cells.

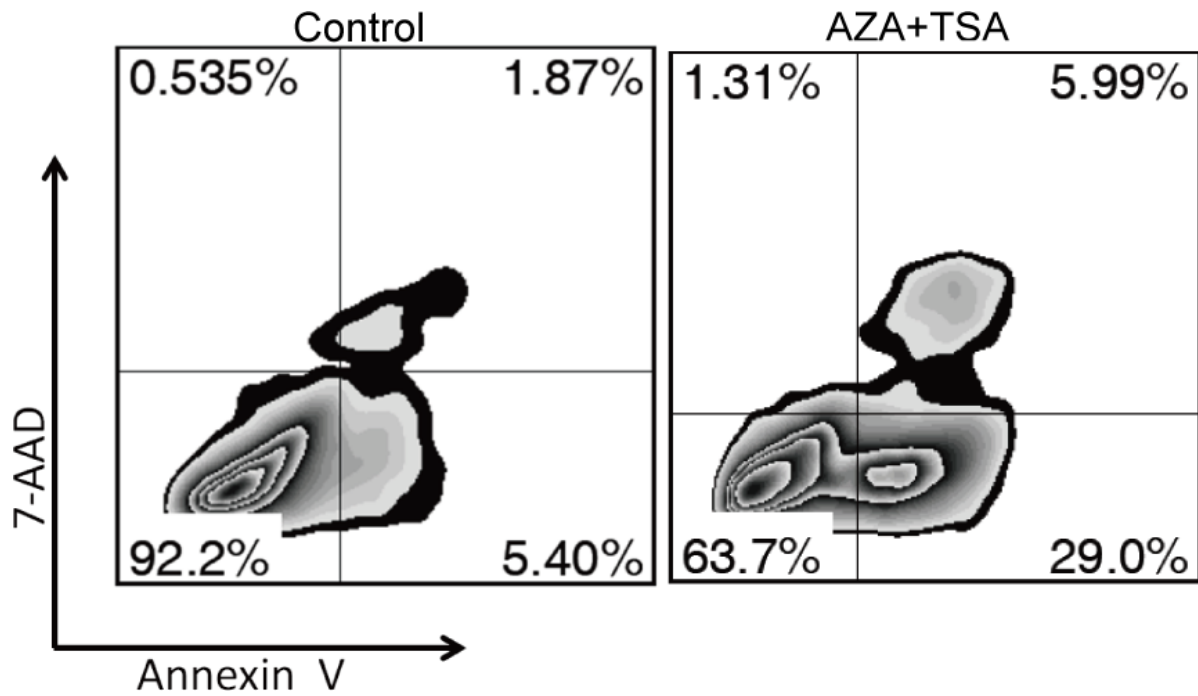

**Supplementary Figure S3: AZA and TSA treatment induces apoptosis.** Annexin V/7-AAD flow cytometry results of HCT116 cells after AZA and TSA treatment.

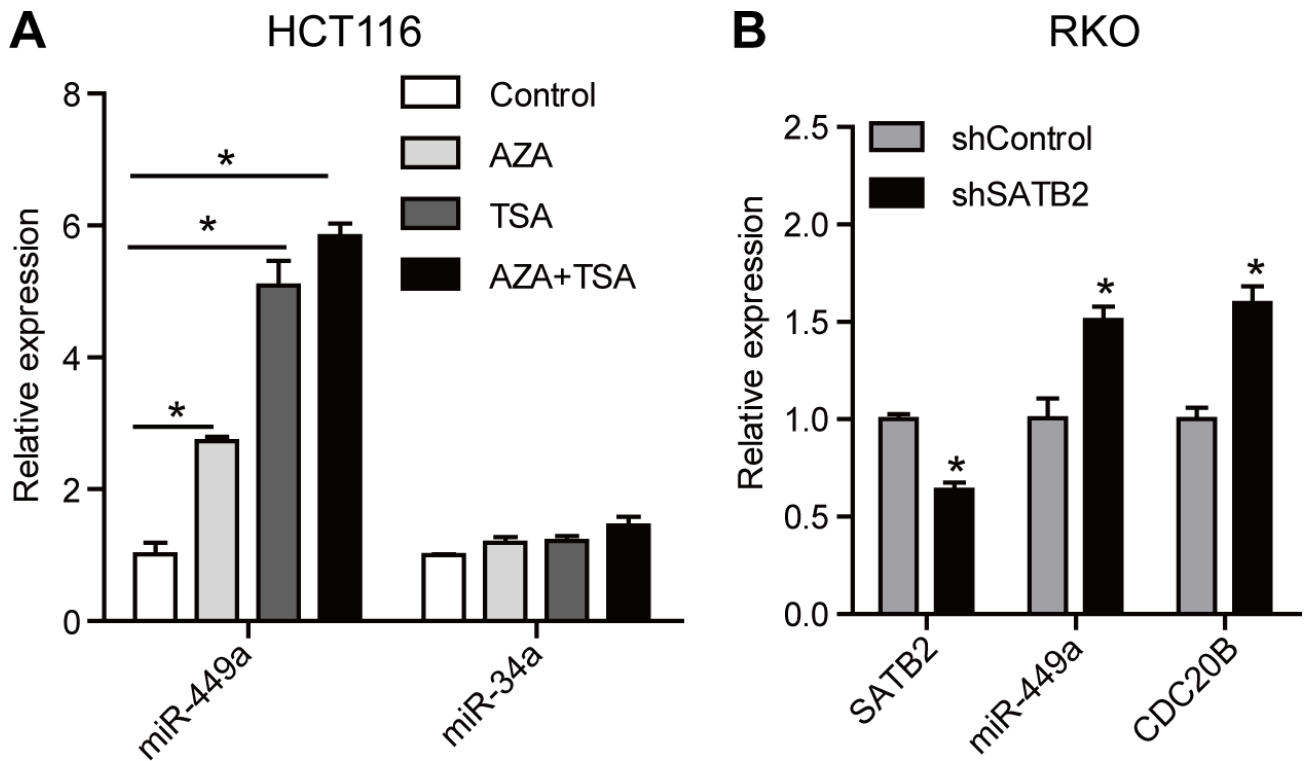

**Supplementary Figure S4: miR-449a is activated by AZA and TSA treatment and SATB2 knockdown.** (A) miR-449a and miR-34a mRNA levels after AZA, TSA or AZA + TSA treatment in HCT116. (B) SATB2, miR-449a, and CDC20B mRNA levels after SATB2 knockdown in RKO cells.

**Supplementary Table S1: Primers or sequences for construction of plasmids, real-time, microRNA mimics or siRNAs.** See Supplementary\_Table\_S1

**Supplementary Table S2: The clinic pathogenic characteristics and clinical pathological stages of 50 patients**

| No. | Age | Gender | Stage | Death | Tumor differentiation |
|-----|-----|--------|-------|-------|-----------------------|
| 1   | 55  | female | I     | no    | medium                |
| 2   | 50  | female | I     | no    | medium                |
| 3   | 62  | female | I     | no    | medium                |
| 4   | 75  | male   | I     | no    | high                  |
| 5   | 26  | female | I     | no    | medium                |
| 6   | 77  | male   | I     | no    | medium                |
| 7   | 72  | male   | I     | no    | low                   |
| 8   | 50  | male   | I     | no    | medium                |
| 9   | 40  | female | I     | no    | low                   |
| 10  | 70  | female | I     | no    | medium                |
| 11  | 59  | male   | II    | yes   | medium                |
| 12  | 80  | male   | II    | no    | medium                |
| 13  | 55  | male   | II    | no    | medium                |
| 14  | 77  | male   | II    | no    | medium                |
| 15  | 67  | male   | II    | no    | medium                |
| 16  | 65  | male   | II    | no    | medium                |
| 17  | 71  | female | II    | no    | low                   |
| 18  | 61  | male   | II    | no    | medium                |
| 19  | 51  | male   | II    | no    | medium                |
| 20  | 55  | female | IIA   | yes   | medium                |
| 21  | 89  | male   | IIA   | yes   | medium                |
| 22  | 74  | female | IIA   | yes   | low                   |
| 23  | 77  | male   | IIA   | yes   | medium                |
| 24  | 70  | female | IIB   | no    | medium                |
| 25  | 53  | male   | IIB   | no    | medium                |
| 26  | 69  | female | IIIC  | no    | medium                |
| 27  | 52  | male   | IIIC  | no    | medium                |
| 28  | 61  | male   | IIIC  | no    | medium                |
| 29  | 63  | male   | IIIC  | no    | medium                |
| 30  | 70  | female | IIIA  | no    | medium                |
| 31  | 54  | male   | IIIA  | no    | medium                |
| 32  | 65  | male   | IIIB  | no    | medium                |
| 33  | 62  | male   | IIIB  | no    | low                   |
| 34  | 75  | female | IIIB  | no    | low                   |
| 35  | 62  | female | IIIC  | yes   | low                   |
| 36  | 76  | male   | IVA   | yes   | medium                |
| 37  | 54  | male   | IVA   | no    | low                   |
| 38  | 50  | male   | IVA   | no    | medium                |
| 39  | 70  | male   | IVA   | no    | low                   |
| 40  | 78  | male   | IVA   | yes   | low                   |
| 41  | 67  | female | IVA   | no    | medium                |
| 42  | 70  | male   | IVB   | yes   | medium                |
| 43  | 58  | male   | IVB   | yes   | medium                |
| 44  | 42  | male   | IVB   | yes   | medium                |
| 45  | 72  | female | IVB   | yes   | low                   |
| 46  | 63  | male   | IVA   | yes   | medium                |
| 47  | 75  | female | IVA   | yes   | medium                |
| 48  | 77  | female | IVB   | yes   | medium                |
| 49  | 69  | female | IVB   | yes   | low                   |
| 50  | 71  | female | IVB   | yes   | low                   |
